# Supplementary material for: A catalyst superior to carbon-supported-platinum for promotion of the oxygen reduction reaction: reduced-polyoxometalate supported palladium
Source: Royal Society of Chemistry journal article supplement (doi:10.1039/c5ta02196k), 2015-01-01
Supplement: c5ta02196k1.pdf [file c5ta02196k1.pdf]

## Supporting Information

### **A Catalyst superior to carbon-supported-platinum for promotion of the oxygen reduction reaction: reduced-polyoxometalate supported palladium**

Xiaohong Xie, Yao Nie, Siguo Chen, Wei Ding, Xueqiang Qi, Li Li and Zidong Wei\*

Dr. X. Xie, Dr. Y. Nie, Dr. S. Chen, Dr. W. Ding, Dr X. Qi, Dr. L. Li, Prof. Z. Wei

Chongqing Key Laboratory of Chemical Process for Clean Energy and Resource Utilization,  
School of Chemistry and Chemical Engineering, Chongqing University, Chongqing 400044,  
PR China

E-mail: [zdwei@cqu.edu.cn](mailto:zdwei@cqu.edu.cn)

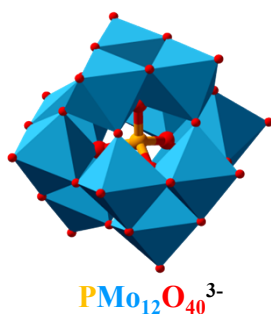

Polyoxometalates are well-defined at atomic-molecular levels with a wide range of structures. In particular, the Keggin-type Polyoxometalates ( $\text{XM}_{12}\text{O}_{40}^{n-}$ ,  $\text{X} = \text{P}, \text{Si}/\text{M} = \text{W}, \text{Mo}, \text{V}$ ), which offer favorable accessibility of electron transfer from empty d orbitals for metal–oxygen  $\pi$  bonding, consist of an encapsulated central  $\text{XO}_4$  tetrahedral structure and 3 octahedra sharing corners, edges, and terminal sites made by 12 pieces of  $\text{MO}_6$  octahedral addenda atoms.

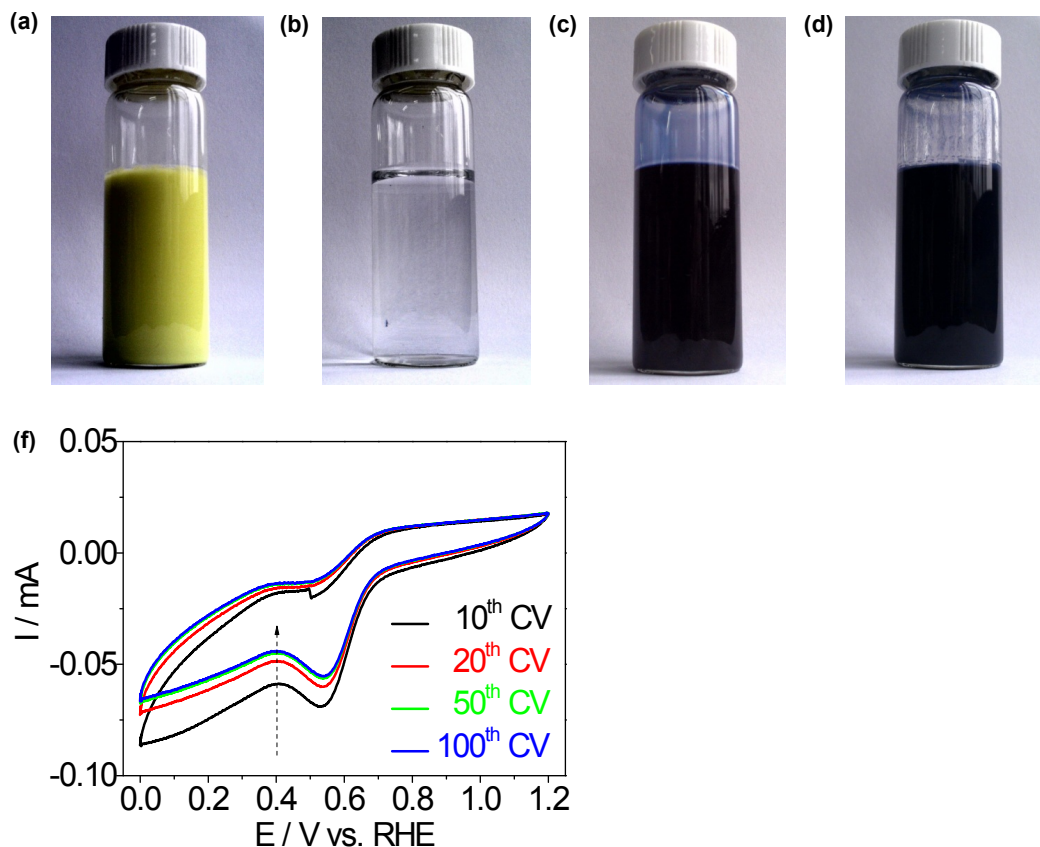

**Figure S1.** A simple introduction of the keggin-type anionic cluster (top); (a) pristine POM; (b) POM + 0.1 M KOH (POM dissolved in alkaline media); (c) rPOM (blue-colored, prepared by  $\text{NaBH}_4$  reduction); (d) rPOM + 0.1 M KOH (blue colored, rPOM is chemically stable in alkaline media); (f) CV curves for rPOM modified electrode measured in 0.1 M KOH electrolyte with a scan rate of  $50 \text{ mV} \cdot \text{s}^{-1}$ .

The electrochemical behavior of POMs in acidic reducing conditions involves one or two electron reversible reductions to produce reduced POMs, or so-called heteropoly blues owing to their changed color, and further irreversible multielectron reduction with decomposition in the homogeneous state [*Chem. Rev.* **1998**, 98, 219]. The reduced-POMs are both chemically and electrochemically stable in alkaline media.

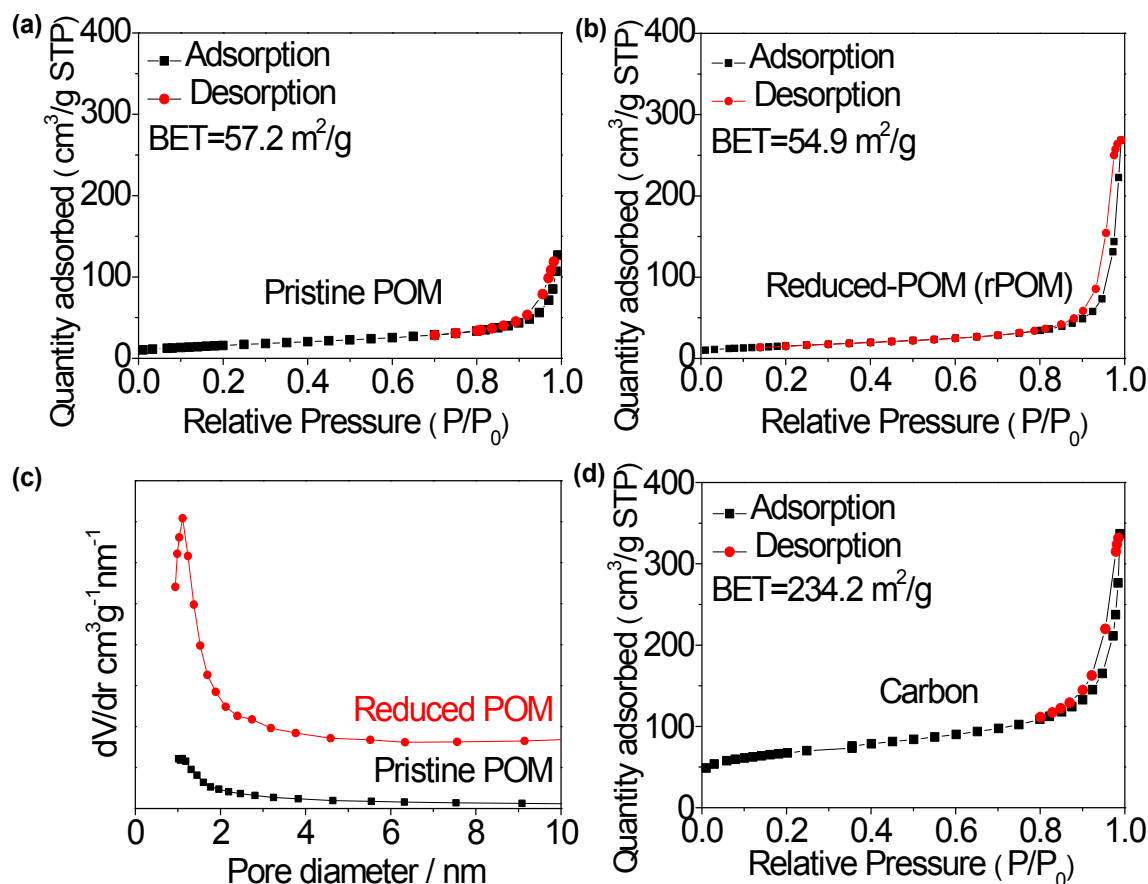

**Figure S2.** Nitrogen adsorption/desorption isotherms of (a) pristine POM, (b) reduced POM and (d) carbon; (c) BJH pore size distribution of pristine POM and the reduced POM.

Considering the small surface area of the nanosized POM ( $57.2 \text{ m}^2 \cdot \text{g}^{-1}$ ) and the large surface area of the carbon support ( $234.2 \text{ m}^2 \cdot \text{g}^{-1}$ ) (The former is about the 1/4 of the later), it is very difficult and unfair to synthesize Pd/rPOM and Pd/C with identical loadings and identical Pd particle size. More specifically, a higher Pd loading (20 wt %, for instance) in the case of Pd/rPOM certainly leads to the aggregation/sintering of Pd NPs and thus a large Pd particle because of the small rPOM surface area. On the other side, if we lowered Pd loadings on carbon to 5 wt % it would results in a thick catalyst layer of Pd/C catalyst and thus a larger electronic double layer and a poor mass transport in comparison with Pd/rPOM due to the high surface area of carbon and the small surface area of rPOM. Therefore, the Pd loading in the Pd/rPOM and Pd/C materials should be well designed to overcome the above dilemma. In this work, the Pd loading in the Pd/rPOM material (intake, 5 wt %) is designed to be 1/4 of that in the Pd/C catalyst (intake, 20 wt %) according to the BET area of the two supports (rPOM and carbon powder) to guarantee the same catalyst layer for the two comparative electrodes made of the catalysts Pd/rPOM and Pd/C.

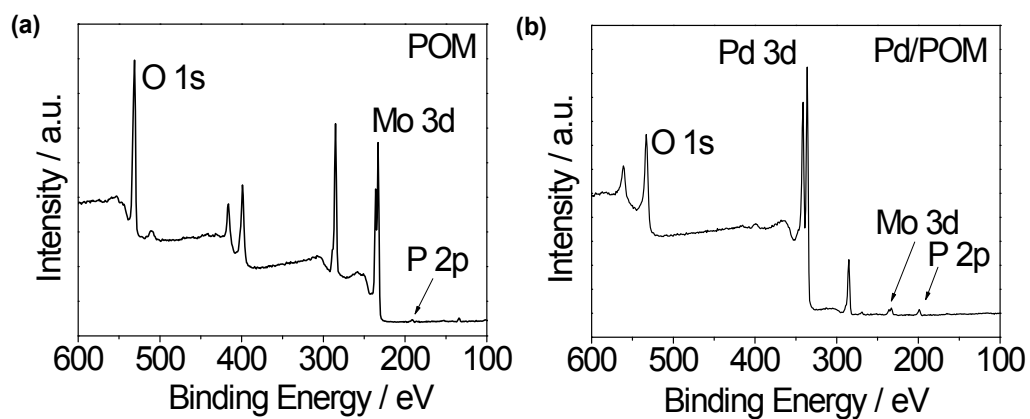

**Figure S3.** XPS spectra of (a) pristine POM and (b) Pd/rPOM.

**Figure S4.** (a) TEM images and EDAX spectrum of the Pd/rPOM hybrids; TEM images of (b) the as-prepared 20% Pd/C and (c) 40% JM-Pt/C catalysts.

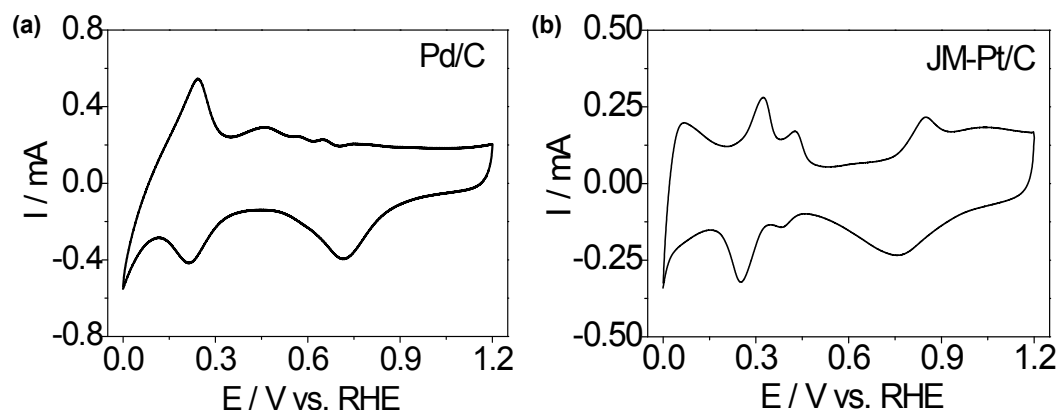

**Figure S5.** CV curves for (a) Pd/C and (b) Pt/C catalysts recorded in  $\text{N}_2$ -saturated 0.1 M KOH electrolyte.

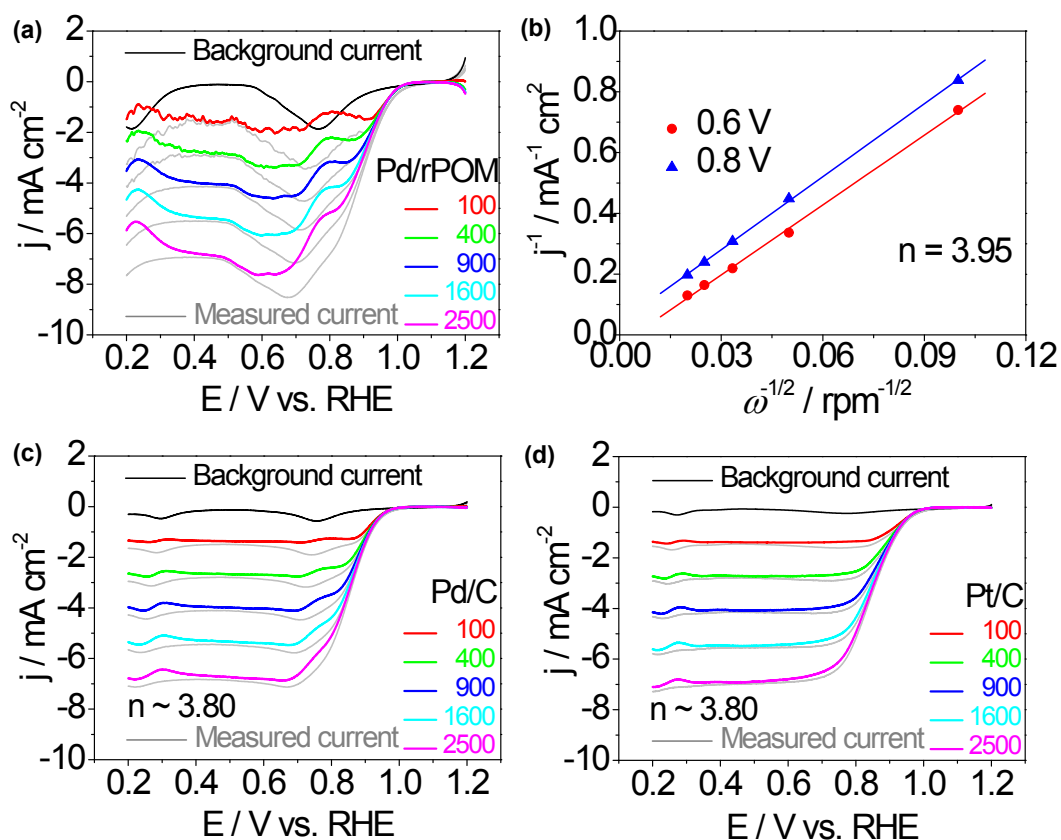

**Figure S6.** (a) ORR polarisation curves for Pd/rPOM catalyst in  $\text{O}_2$ -saturated 0.1 M KOH electrolyte at a scan rate of  $10 \text{ mV} \cdot \text{s}^{-1}$  over a range of rotation rates of 100-2500 rpm; (b) Koutecky-Levich plots for the oxygen reduction obtained from the ORR data presented in (a); (c)-(d) ORR polarisation curves for Pd/C and Pt/C catalysts, respectively.

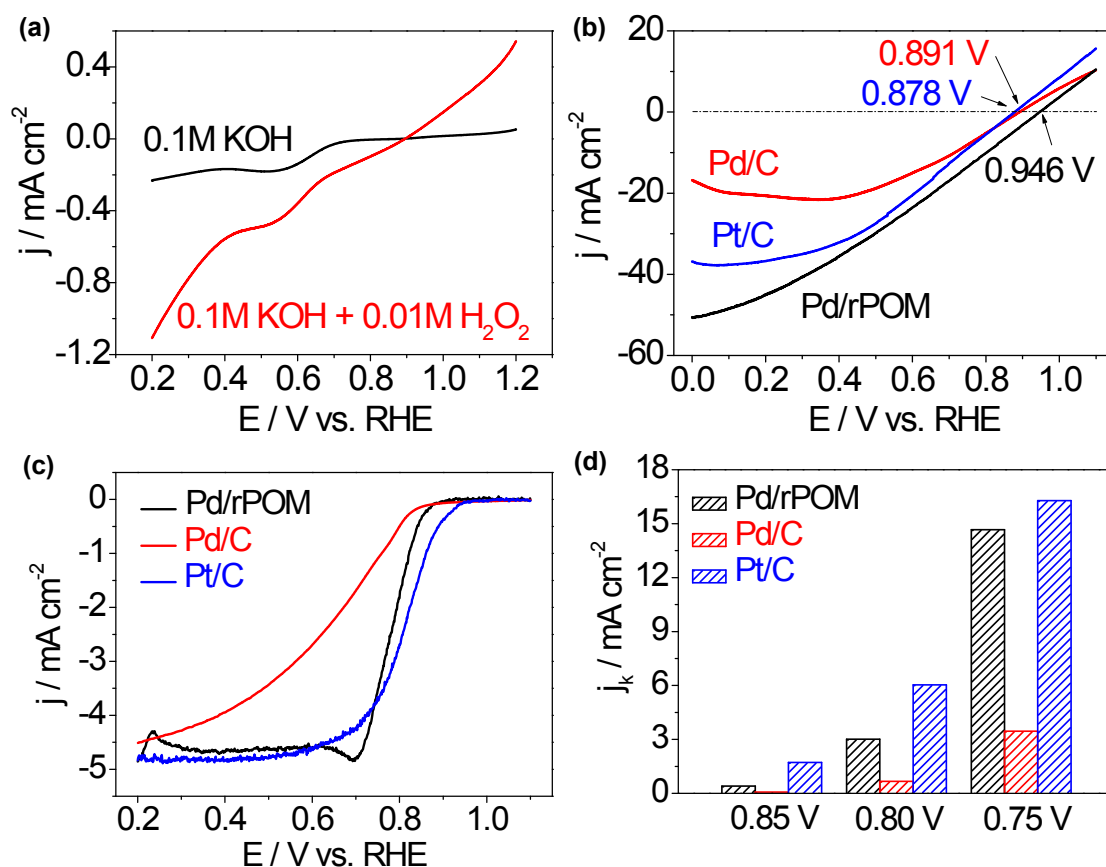

**Figure S7.** (a) Polarisation curves showing the H<sub>2</sub>O<sub>2</sub> reduction current of the rPOM material recorded in N<sub>2</sub>-saturated 0.1 M H<sub>2</sub>O<sub>2</sub> + 0.1 M KOH electrolyte at a scan rate of 10 mV·s<sup>-1</sup> (1600 rpm). (b) Polarisation plots for H<sub>2</sub>O<sub>2</sub> electro-reduction at the Pd/C electrode, the Pt/C electrode and the Pd/rPOM electrode in 0.1 M KOH + 0.1 M H<sub>2</sub>O<sub>2</sub> at a scan rate of 10 mV·s<sup>-1</sup> and a rotation rate of 1600 rpm, and the loading amount of catalytic metal Pt or Pd on all electrodes are the same (~10 ug). (c) Polarization for Pd/rPOM, Pd/C and Pt/C recorded in O<sub>2</sub> saturated 0.1 M HClO<sub>4</sub> electrolyte at a 10 mV·s<sup>-1</sup> scan rate (rpm = 1600), (d) the ORR kinetic current densities of the Pd/rPOM, Pd/C and Pt/C calculated from the polarization curves in (c).
